# Supplementary material for: Carbazole/fluorene-substituted 5-phenyl-2,2′-bipyridine D–π–A fluorophores: photophysical data, hyperpolarizability and CT-indices
Source: Royal Society of Chemistry journal article supplement (doi:10.1039/d3nj00394a), 2023-01-01
Supplement: d3nj00394a1.pdf [file d3nj00394a1.pdf]

**Electronic Supplementary Information**

**CARBAZOLE/FLUORENE SUBSTITUTED 5-PHENYL-2,2'-BIPYRIDINE D- $\pi$ -A  
FLUOROPHORES: PHOTOPHYSICAL DATA, HYPERPOLARIZABILITY AND CT-  
INDICES**

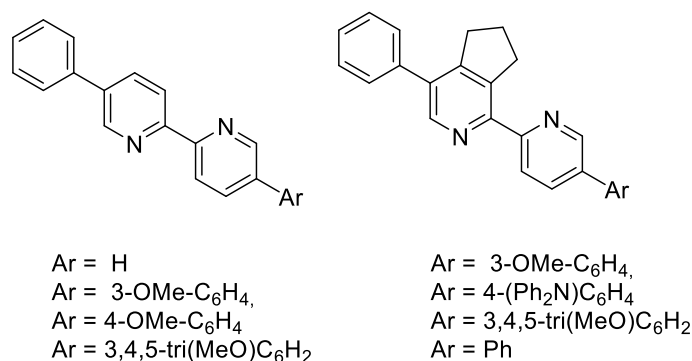

**Figure S1** The structures of 5,5'-diaryl-2,2'-bipyridines fluorophores reported previously by our group<sup>1,2</sup>

### Materials, equipments, measurements and characterization methods

UV-vis absorption spectra were recorded on the Shimadzu UV-1800 spectrophotometer using quartz cells with 1 cm path length at room temperature. Emission and excitation spectra were measured on a Horiba FluoroMax-4 using quartz cells with 1 cm path length at room temperature. Absolute quantum yields for compounds **6a-c** and **7a-c** were obtained by the Integrating Sphere Quanta-φ of the Horiba-Fluoromax-4. Time-resolved fluorescence measurements were carried out using time-correlated single-photon counting (TCSPC) with a nanosecond LED (370 nm). <sup>1</sup>H NMR and <sup>13</sup>C NMR spectra were recorded on the Bruker Avance-400 spectrometer at 298 K, digital resolution ±0.01 ppm. Chemical shifts are expressed in parts per million (δ) and are referenced to tetramethylsilane (TMS) as internal standard and the signals were reported as s (singlet), d (doublet), t (triplet), m (multiplet), and coupling constants J were given in Hz. Mass-spectra were recorded on GCMS-QP2010 Ultra (Shimadzu). TLC was done on silica gel coated aluminum slide (Merck, Silica gel G for TLC). Silica gel (60–120 mesh, SRL, India) was used for column chromatography. All solvents were dried and distilled before use. Commercially available substrates were freshly distilled before the reaction. Solvents, reagents, and chemicals were purchased from Aldrich, Fluka, Merck, SRL, Spectrochem, and Process Chemicals. All reactions involving moisture-sensitive reactants were executed using oven-dried glassware.

### Photoluminescence absolute quantum yield (PLQY) measurement

For each sensor was measured of absorption spectrum so that the concentration of solution was less 0,1 of optical density at selected wavelength to minimize inner-filter effect. For blank (naked solvent) and sensor solution were recorded of emission and Rayleigh scattering spectra by using Integrating Sphere of HORIBA FluoroMax-4. PLQY was calculated by equation:

$$\phi = (E_c - E_a) / (L_a - L_c),$$

where  $E_c$  and  $L_c$  are the integrated luminescence of the sensor and blank,  $E_a$  and  $L_a$  are the integrated excitation profile of the sensor and blank.

### Time-correlated single-photon counting (TCSPC)

For sensors was measured of absorption spectrum so that the concentration of solution was less 0,1 of absorption intensity at selected wavelength. Time-resolved fluorescence measurements were carried out using time-correlated single-photon counting (TCSPC) with a nanosecond LED (310 nm).

**Table S1.** Fluorescence lifetime of probes **6a-c** and **7a-c** ( $C = 2 \times 10^{-6}$  M) in MeCN at r.t.

| Entry    | Compound  | $\tau_1$ , ns <sup>a</sup> | $\alpha_1$ <sup>b</sup> | $\tau_2$ , ns <sup>a</sup> | $\alpha_2$ <sup>b</sup> | $\tau_{av}$ , ns <sup>a</sup> | $\chi^2$ <sup>d</sup> |
|----------|-----------|----------------------------|-------------------------|----------------------------|-------------------------|-------------------------------|-----------------------|
| <b>1</b> | <b>7a</b> | 1.55                       | 0.1952                  | 3.35                       | 0.8048                  | 3.4                           | 0.95                  |
| <b>2</b> | <b>7b</b> | 1.26                       | 0.2739                  | 2.61                       | 0.7261                  | 2.6                           | 0.90                  |

|          |           |      |        |      |        |     |      |
|----------|-----------|------|--------|------|--------|-----|------|
| <b>3</b> | <b>7c</b> | 0.82 | 0.7984 | 1.64 | 0.2016 | 1.6 | 0.83 |
| <b>4</b> | <b>6a</b> | 1.25 | 0.2829 | 2.77 | 0.7171 | 2.8 | 0.87 |
| <b>5</b> | <b>6b</b> | 1.17 | 0.3226 | 2.46 | 0.6774 | 2.5 | 0.92 |
| <b>6</b> | <b>6c</b> | 0.75 | 0.8508 | 1.53 | 0.1492 | 1.5 | 1.17 |

<sup>a</sup> Decay time, <sup>b</sup> Fractional contribution, <sup>c</sup> Weighted average decay time  $\tau_{av} = \sum (\tau_i \times \alpha_i)$ , <sup>d</sup> Quality of fitting

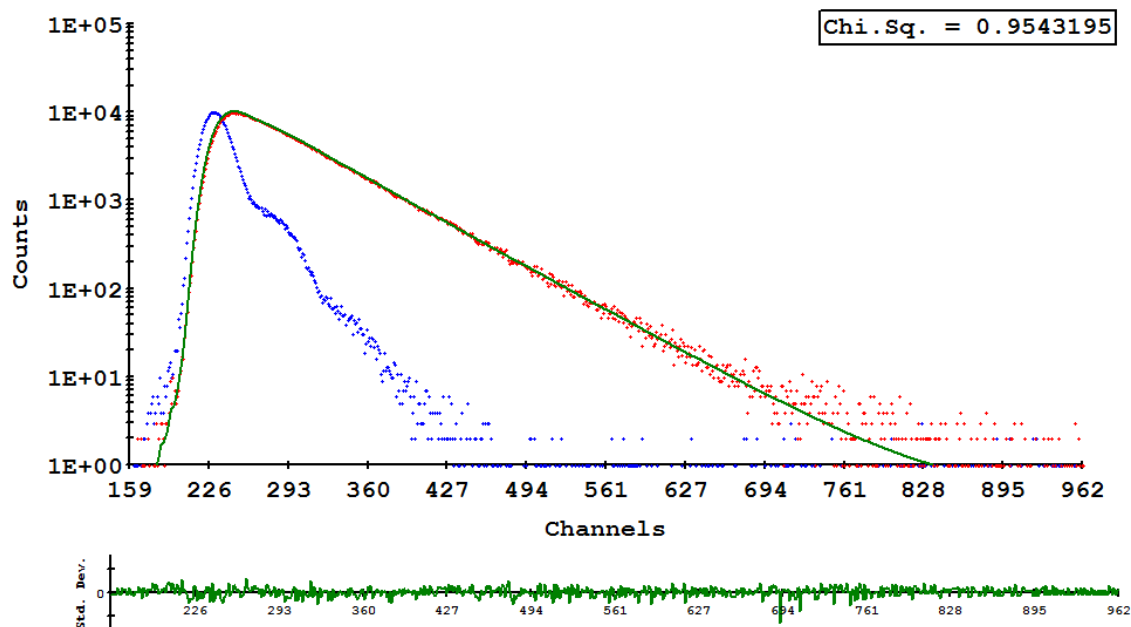

**Figure S2** TCSPC measurement of compound **7a** in MeCN with corresponding residuals and  $\chi^2$

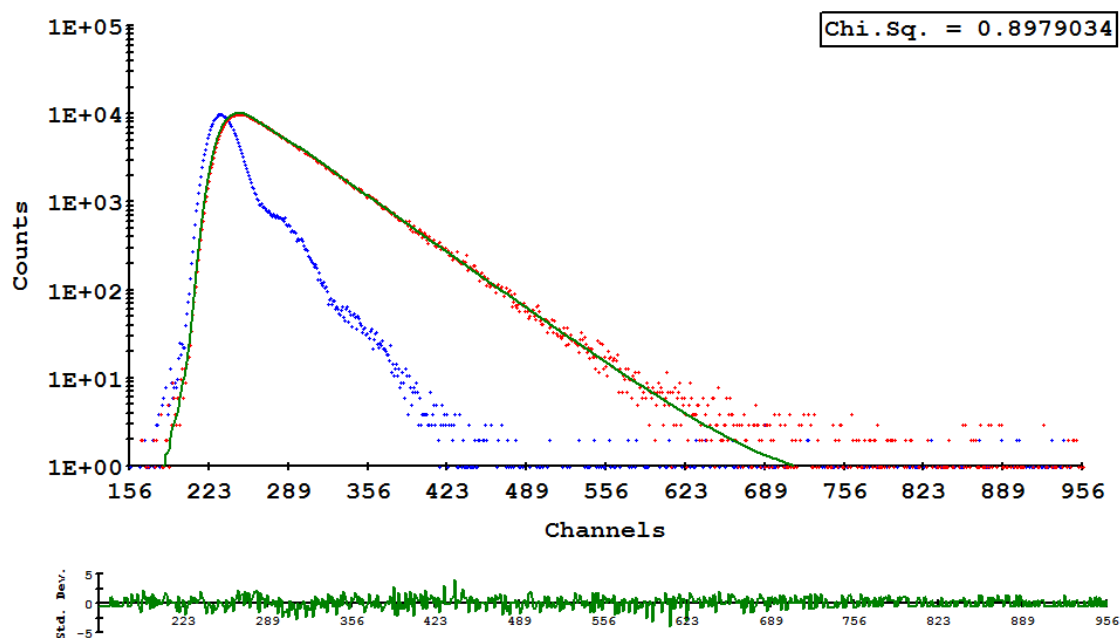

**Figure S3** TCSPC measurement of compound **7b** in MeCN with corresponding residuals and  $\chi^2$

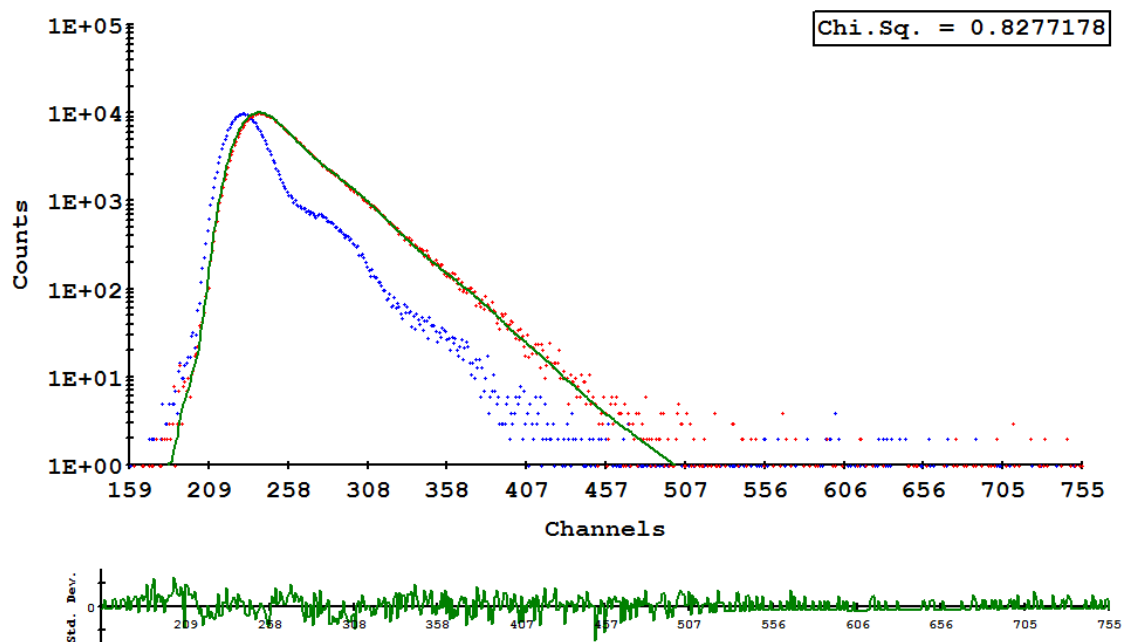

**Figure S4** TCSPC measurement of compound **7c** in MeCN with corresponding residuals and  $\chi^2$

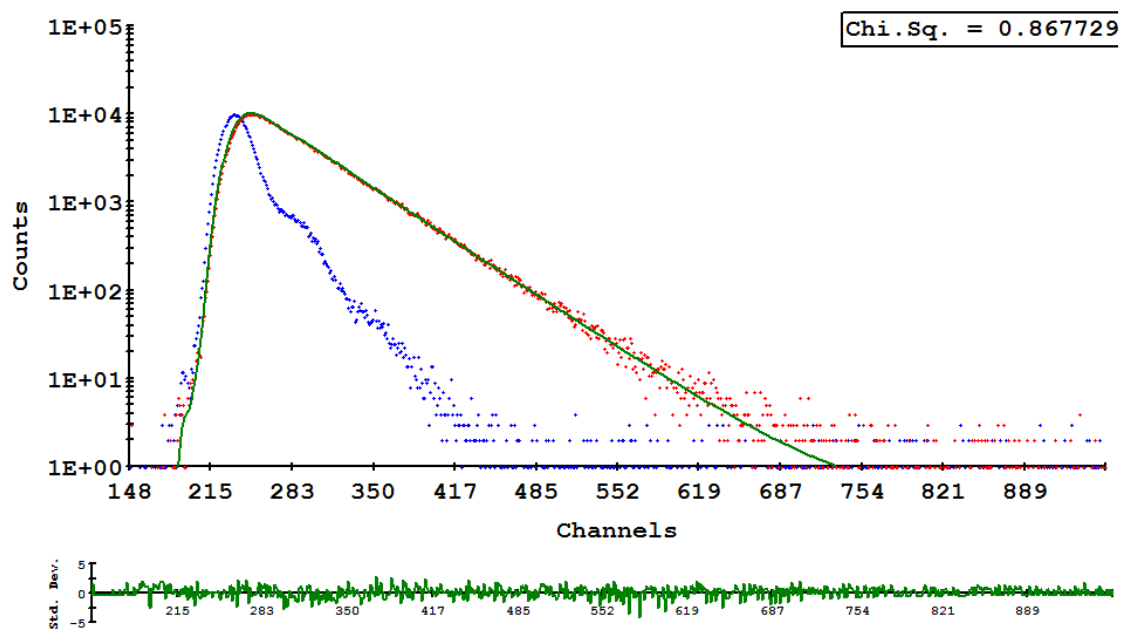

**Figure S5** TCSPC measurement of compound **6a** in MeCN with corresponding residuals and  $\chi^2$

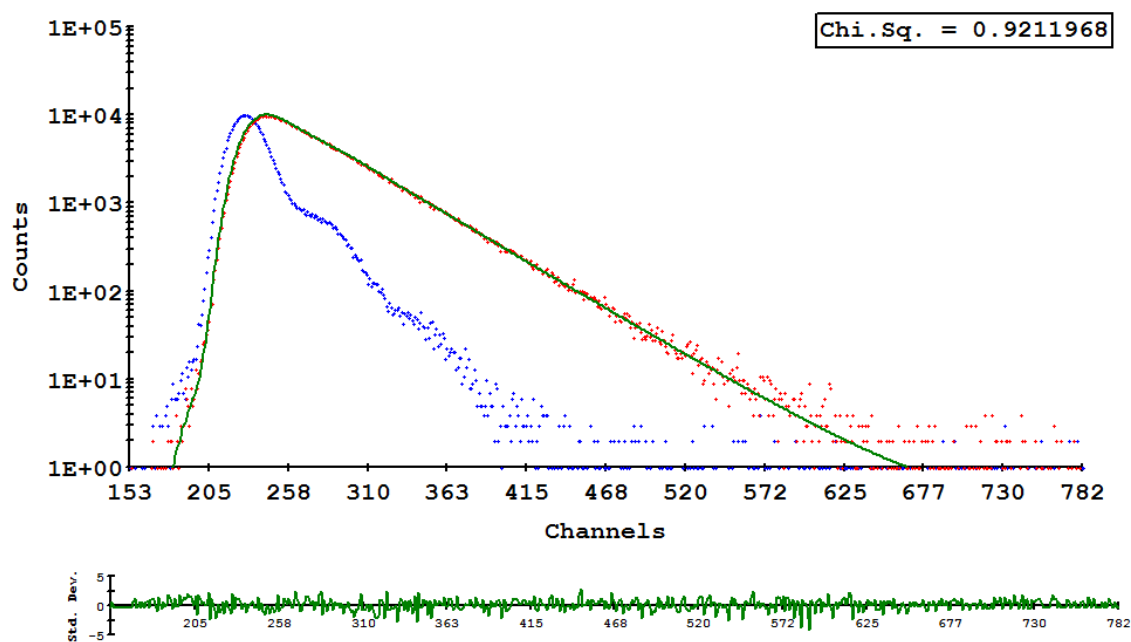

**Figure S6** TCSPC measurement of compound **6b** in MeCN with corresponding residuals and  $\chi^2$

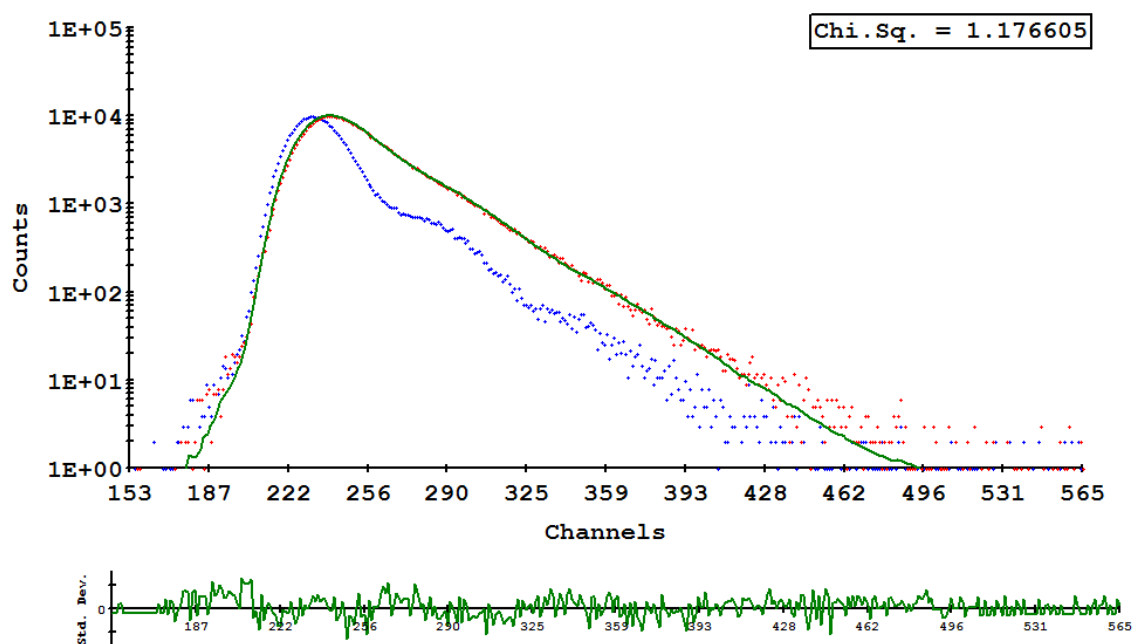

**Figure S7** TCSPC measurement of compound **6c** in MeCN with corresponding residuals and  $\chi^2$

**Table S2.** Orientation polarizability for solvents ( $\Delta f$ ), UV/Vis absorption and fluorescence emission maxima and Stokes shift of **6a** in different solvents

| Solvent                  | $\Delta f$ | $\lambda_{\text{abs}}$ , nm | $\lambda_{\text{em}}$ , nm | Stokes shift, $\text{cm}^{-1}$ (nm) |
|--------------------------|------------|-----------------------------|----------------------------|-------------------------------------|
| Cyclohexane              | 0.001      | 321                         | 369                        | 4052 (48)                           |
| Toluene                  | 0.013      | 322                         | 379                        | 4671 (57)                           |
| 1,4-Dioxane              | 0.131      | 316                         | 388                        | 5872 (72)                           |
| $\text{CH}_2\text{Cl}_2$ | 0.218      | 318                         | 409                        | 6997 (91)                           |
| DMSO                     | 0.26       | 320                         | 454                        | 9223 (134)                          |
| DMF                      | 0.27       | 324                         | 440                        | 8137 (116)                          |
| MeCN                     | 0.304      | 314                         | 442                        | 9324 (128)                          |

**Table S3** Orientation polarizability for solvents ( $\Delta f$ ), UV/Vis absorption and fluorescence emission maxima and Stokes shift of **6b** in different solvents

| Solvent                  | $\Delta f$ | $\lambda_{\text{abs}}$ , nm | $\lambda_{\text{em}}$ , nm | Stokes shift, $\text{cm}^{-1}$ (nm) |
|--------------------------|------------|-----------------------------|----------------------------|-------------------------------------|
| Cyclohexane              | 0.001      | 320                         | 370                        | 4223 (50)                           |
| Toluene                  | 0.013      | 324                         | 393                        | 5419 (69)                           |
| 1,4-Dioxane              | 0.131      | 322                         | 398                        | 5930(76)                            |
| $\text{CH}_2\text{Cl}_2$ | 0.218      | 321                         | 425                        | 7623 (10)                           |
| DMSO                     | 0.26       | 328                         | 484                        | 9827 (156)                          |
| DMF                      | 0.27       | 327                         | 478                        | 9660 (151)                          |
| MeCN                     | 0.304      | 322                         | 475                        | 10394 (153)                         |

**Table S4** Orientation polarizability for solvents ( $\Delta f$ ), UV/Vis absorption and fluorescence emission maxima and Stokes shift of **6c** in different solvents

| Solvent                  | $\Delta f$ | $\lambda_{\text{abs}}$ , nm | $\lambda_{\text{em}}$ , nm | Stokes shift, $\text{cm}^{-1}$ (nm) |
|--------------------------|------------|-----------------------------|----------------------------|-------------------------------------|
| Cyclohexane              | 0.001      | 320                         | 366                        | 3928 (46)                           |
| Toluene                  | 0.013      | 327                         | 372                        | 3699 (45)                           |
| 1,4-Dioxane              | 0.131      | 324                         | 377                        | 4339 (53)                           |
| $\text{CH}_2\text{Cl}_2$ | 0.218      | 323                         | 391                        | 5384 (68)                           |
| DMSO                     | 0.26       | 326                         | 406                        | 6044 (80)                           |
| DMF                      | 0.27       | 327                         | 398                        | 5455 (71)                           |
| MeCN                     | 0.304      | 320                         | 398                        | 6124 (78)                           |

**Table S5** Orientation polarizability for solvents ( $\Delta f$ ), UV/Vis absorption and fluorescence emission maxima and Stokes shift of **7a** in different solvents

| Solvent                  | $\Delta f$ | $\lambda_{\text{abs}}$ , nm | $\lambda_{\text{em}}$ , nm | Stokes shift, $\text{cm}^{-1}$ (nm) |
|--------------------------|------------|-----------------------------|----------------------------|-------------------------------------|
| Cyclohexane              | 0.001      | 326                         | 375                        | 4008 (49)                           |
| Toluene                  | 0.013      | 330                         | 390                        | 4662 (60)                           |
| 1,4-Dioxane              | 0.131      | 328                         | 397                        | 5299 (69)                           |
| $\text{CH}_2\text{Cl}_2$ | 0.218      | 326                         | 424                        | 7090 (98)                           |
| DMSO                     | 0.26       | 330                         | 481                        | 9513 (151)                          |
| DMF                      | 0.27       | 330                         | 471                        | 9071 (141)                          |

|      |       |     |     |             |
|------|-------|-----|-----|-------------|
| MeCN | 0.304 | 323 | 476 | 10048 (154) |
|------|-------|-----|-----|-------------|

**Table S6** Orientation polarizability for solvents ( $\Delta f$ ), UV/Vis absorption and fluorescence emission maxima and Stokes shift of **7b** in different solvents

| Solvent                  | $\Delta f$ | $\lambda_{\text{abs}}$ , nm | $\lambda_{\text{em}}$ , nm | Stokes shift, $\text{cm}^{-1}$ (nm) |
|--------------------------|------------|-----------------------------|----------------------------|-------------------------------------|
| Cyclohexane              | 0.001      | 326                         | 381                        | 4428 (55)                           |
| Toluene                  | 0.013      | 335                         | 399                        | 4788 (64)                           |
| 1,4-Dioxane              | 0.131      | 333                         | 410                        | 5640 (77)                           |
| $\text{CH}_2\text{Cl}_2$ | 0.218      | 333                         | 468                        | 8662 (135)                          |
| DMSO                     | 0.26       | 339                         | 504                        | 9657 (165)                          |
| DMF                      | 0.27       | 333                         | 495                        | 9828 (162)                          |
| MeCN                     | 0.304      | 331                         | 496                        | 10050 (165)                         |

**Table S7** Orientation polarizability for solvents ( $\Delta f$ ), UV/Vis absorption and fluorescence emission maxima and Stokes shift of **7c** in different solvents

| Solvent                  | $\Delta f$ | $\lambda_{\text{abs}}$ , nm | $\lambda_{\text{em}}$ , nm | Stokes shift, $\text{cm}^{-1}$ (nm) |
|--------------------------|------------|-----------------------------|----------------------------|-------------------------------------|
| Cyclohexane              | 0.001      | 326                         | 369                        | 3575 (43)                           |
| Toluene                  | 0.013      | 329                         | 378                        | 3940 (49)                           |
| 1,4-Dioxane              | 0.131      | 328                         | 381                        | 4241 (53)                           |
| $\text{CH}_2\text{Cl}_2$ | 0.218      | 329                         | 398                        | 5269 (69)                           |
| DMSO                     | 0.26       | 334                         | 418                        | 6017 (84)                           |
| DMF                      | 0.27       | 332                         | 404                        | 5368 (72)                           |
| MeCN                     | 0.304      | 327                         | 407                        | 6011 (80)                           |

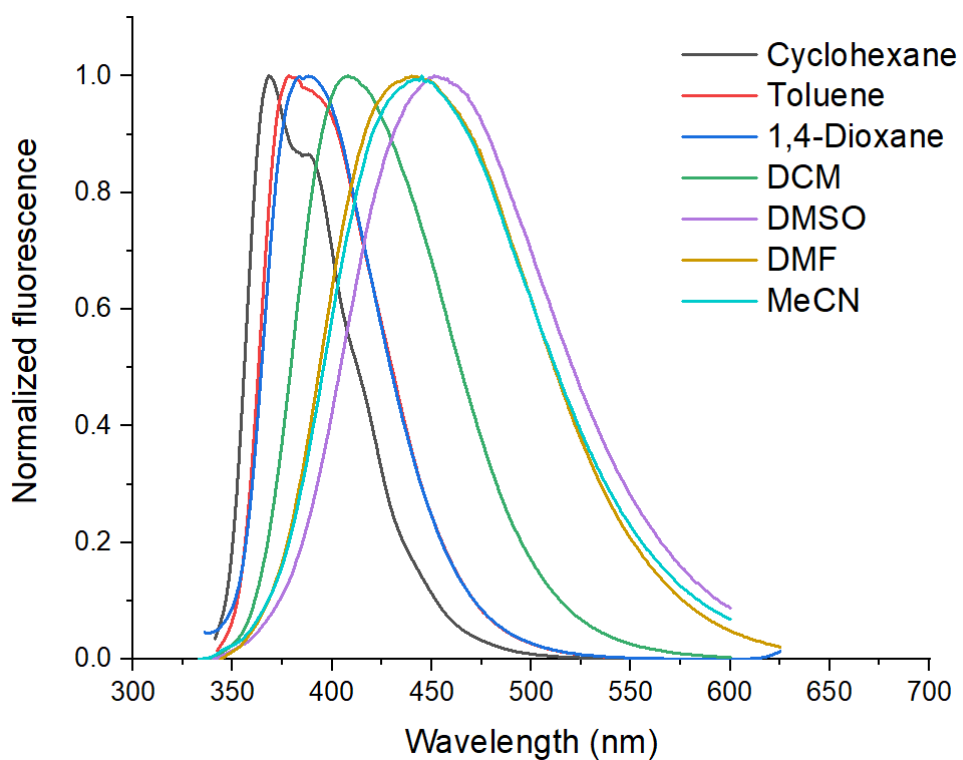

**Figure S8** Normalized fluorescence emission spectra of **6a** in solvents with different polarity ( $c=10^{-5} \text{ M}^{-1}$ )

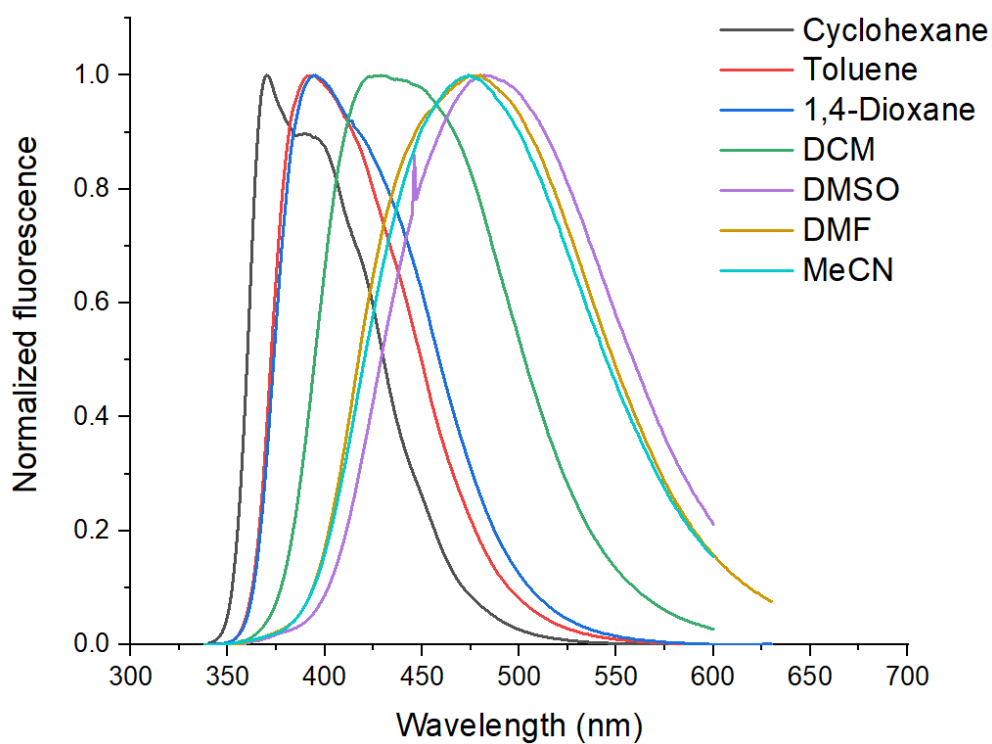

**Figure S9** Normalized fluorescence emission spectra of **6b** in solvents with different polarity ( $c=10^{-5} \text{ M}^{-1}$ )



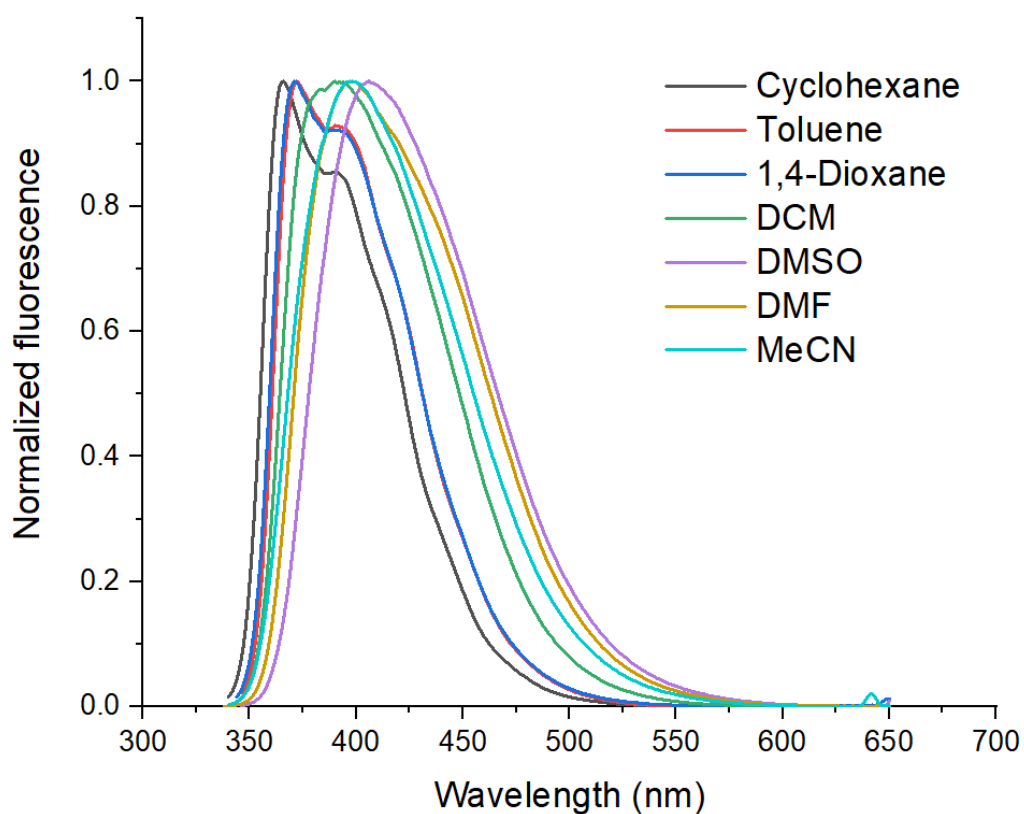

**Figure S10** Normalized fluorescence emission spectra of **6c** in solvents with different polarity ( $c=10^{-5} \text{ M}^{-1}$ )

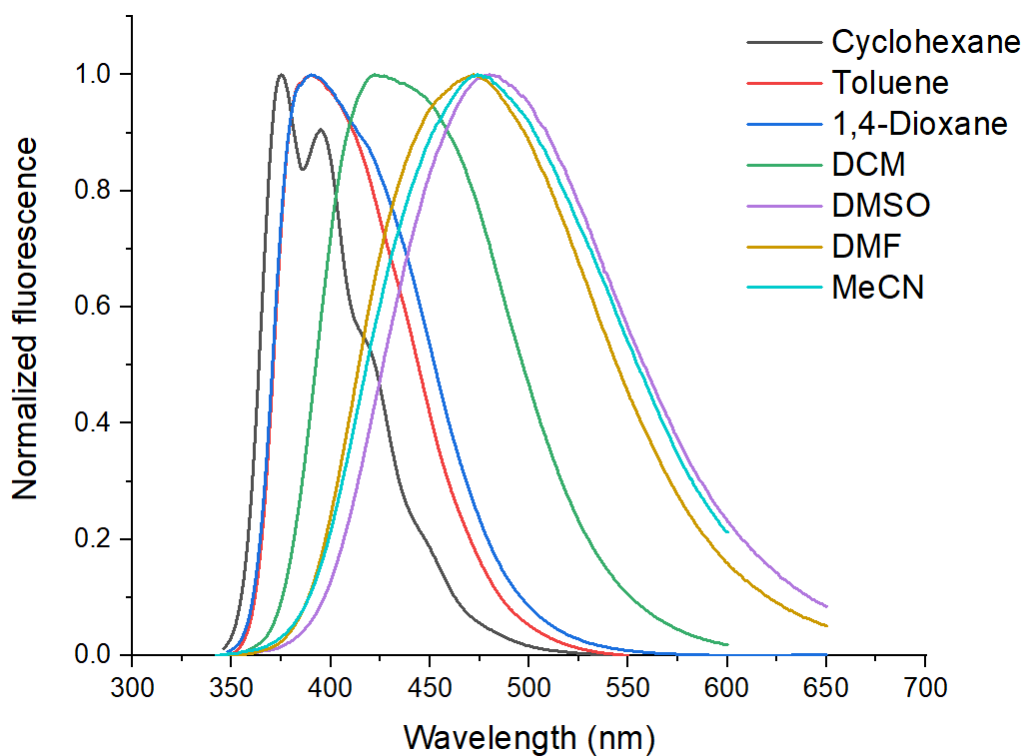

**Figure S11** Normalized fluorescence emission spectra of **7a** in solvents with different polarity ( $c=10^{-5} \text{ M}^{-1}$ )

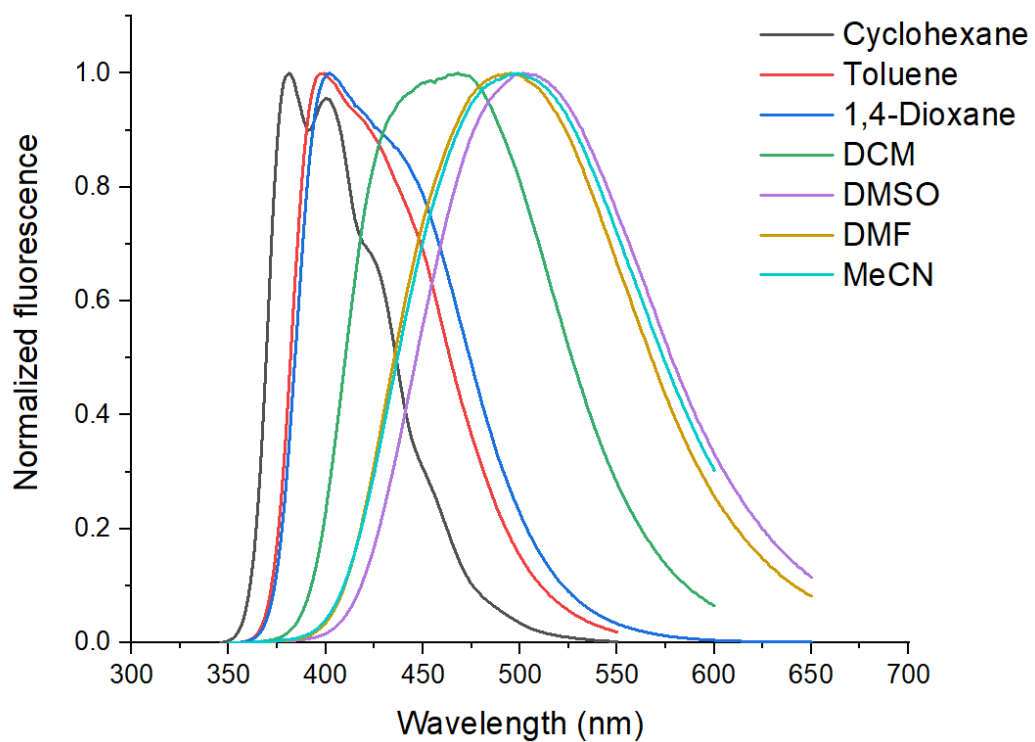

**Figure S12** Normalized fluorescence emission spectra of **7b** in solvents with different polarity ( $c=10^{-5} \text{ M}^{-1}$ )

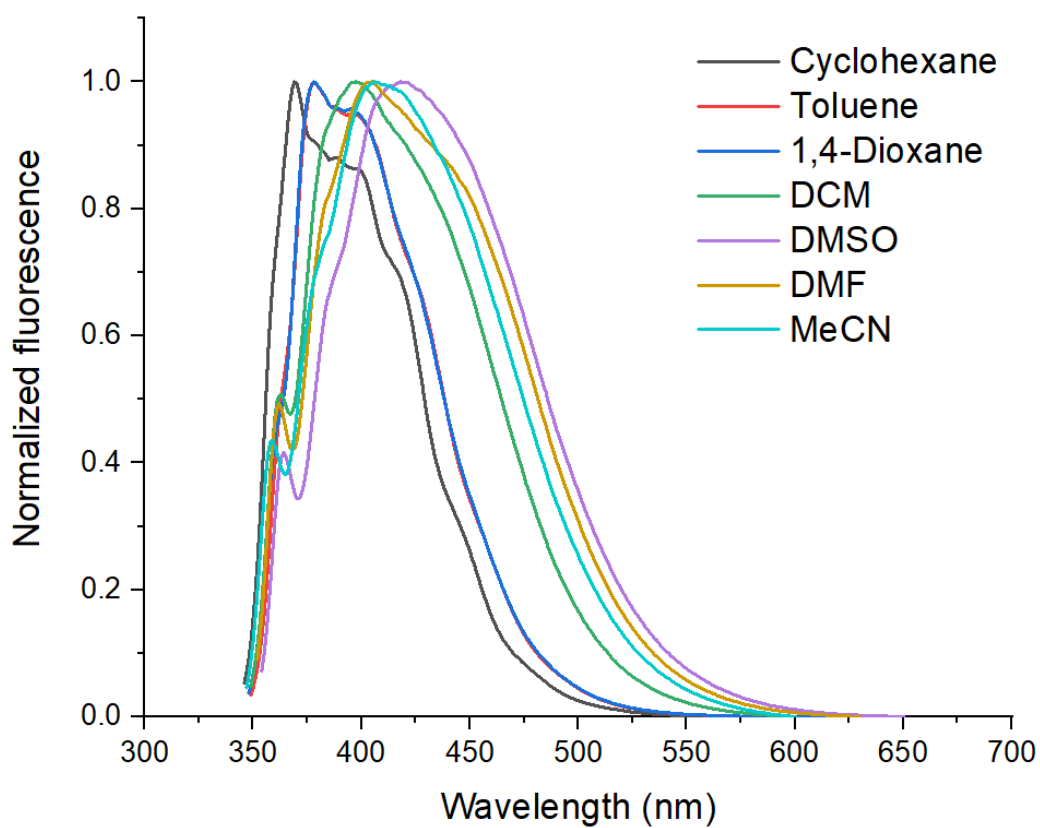

**Figure S13** Normalized fluorescence emission spectra of **7c** in solvents with different polarity ( $c=10^{-5} \text{ M}^{-1}$ )

$$D_X = |X_{ele} - X_{hole}| \quad (S1)$$

$$D_Y = |Y_{ele} - Y_{hole}| \quad (S2)$$

$$D_Z = |Z_{ele} - Z_{hole}| \quad (S3)$$

$$D \text{ index} = \sqrt{(D_X)^2 + (D_Y)^2 + (D_Z)^2} \quad (S4)$$

$$H_\lambda = \frac{(\sigma_{ele,\lambda} + \sigma_{hole,\lambda})}{2\lambda} = \{x, y, z\} \quad (S5)$$

$$H_{CT} = |H\mu_{CT}| \quad (S6)$$

$$H \text{ index} = \frac{(|\sigma_{ele}| + |\sigma_{hole}|)}{2} \quad (S7)$$

$$t \text{ index} = D_{index} - H_{CT} \quad (S8)$$

$$\Lambda \text{ index} = \int \Lambda(r) dr \equiv \int \sqrt{p^{hole}(r) p^{ele}(r)} dr \quad (S9)$$

**Equations S1-S9.** CT-indices calculations, where X, Y, Z (Equations S1-S3) refer to the centroid coordinates of holes and electrons, respectively.

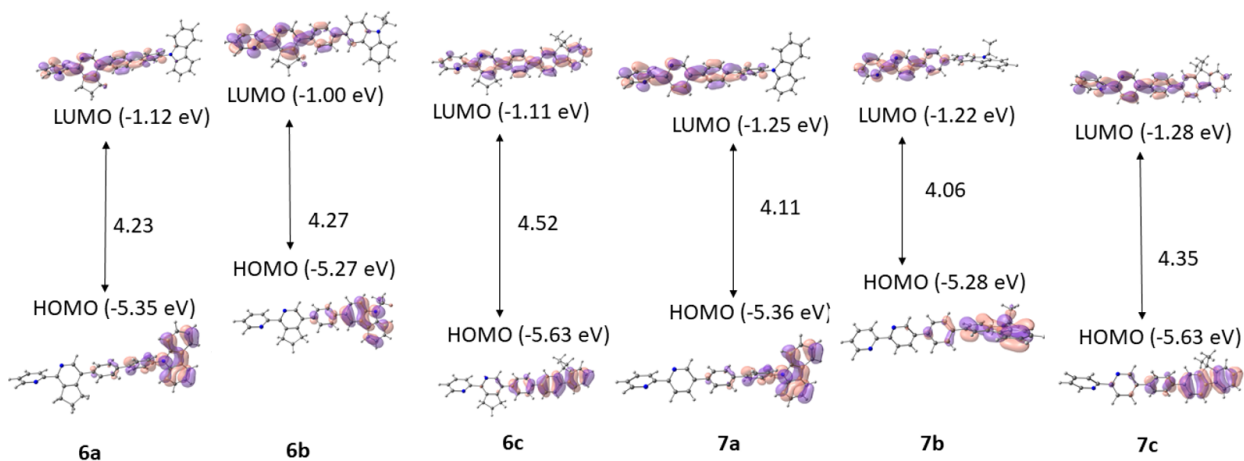

**Figure S14.** Frontier molecular orbitals and the energy level diagrams for **6a-c** and **7a-c** in MeCN.

## NTO “Particle”

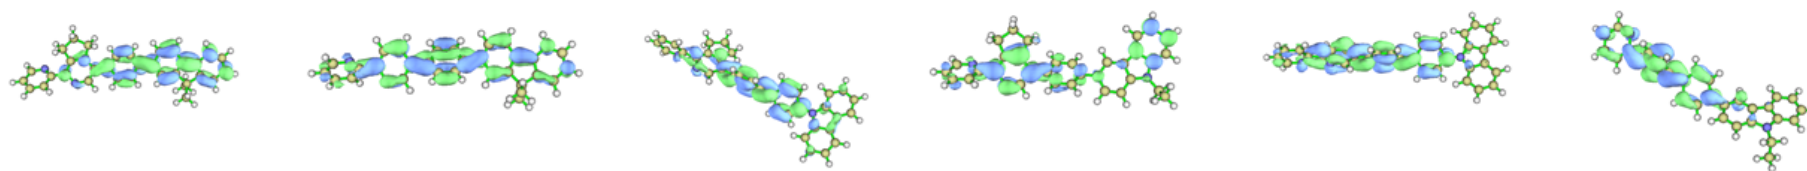

LE

ICT

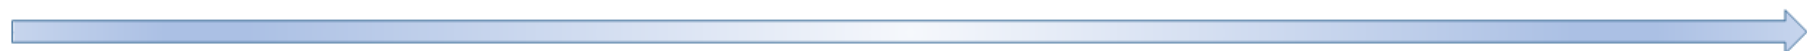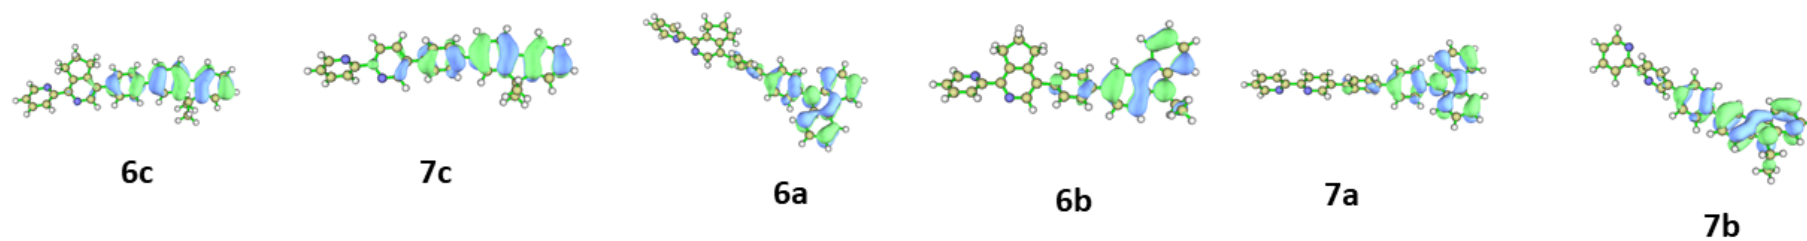

## NTO “Hole”

**Figure S15.** Calculated natural transition orbitals for **6a-c** and **7a-c**

**Table S8.** HOMO/LUMO electron density distribution and optimized structures in  $S_0$  in MeCN and visualization of the MEP Distribution

|                                                                                                     | HOMO/LUMO electron density distribution                                             | Optimized Structures in $S_0$ in MeCN and visualization of the Molecular Electrostatic Potential Distribution |
|-----------------------------------------------------------------------------------------------------|-------------------------------------------------------------------------------------|---------------------------------------------------------------------------------------------------------------|
| 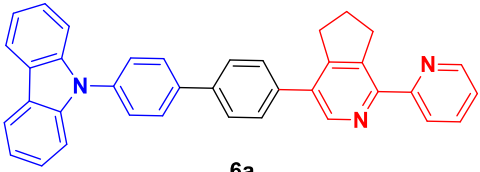 <p><b>6a</b></p>  |   |                            |
|  <p><b>6b</b></p> |  |                           |

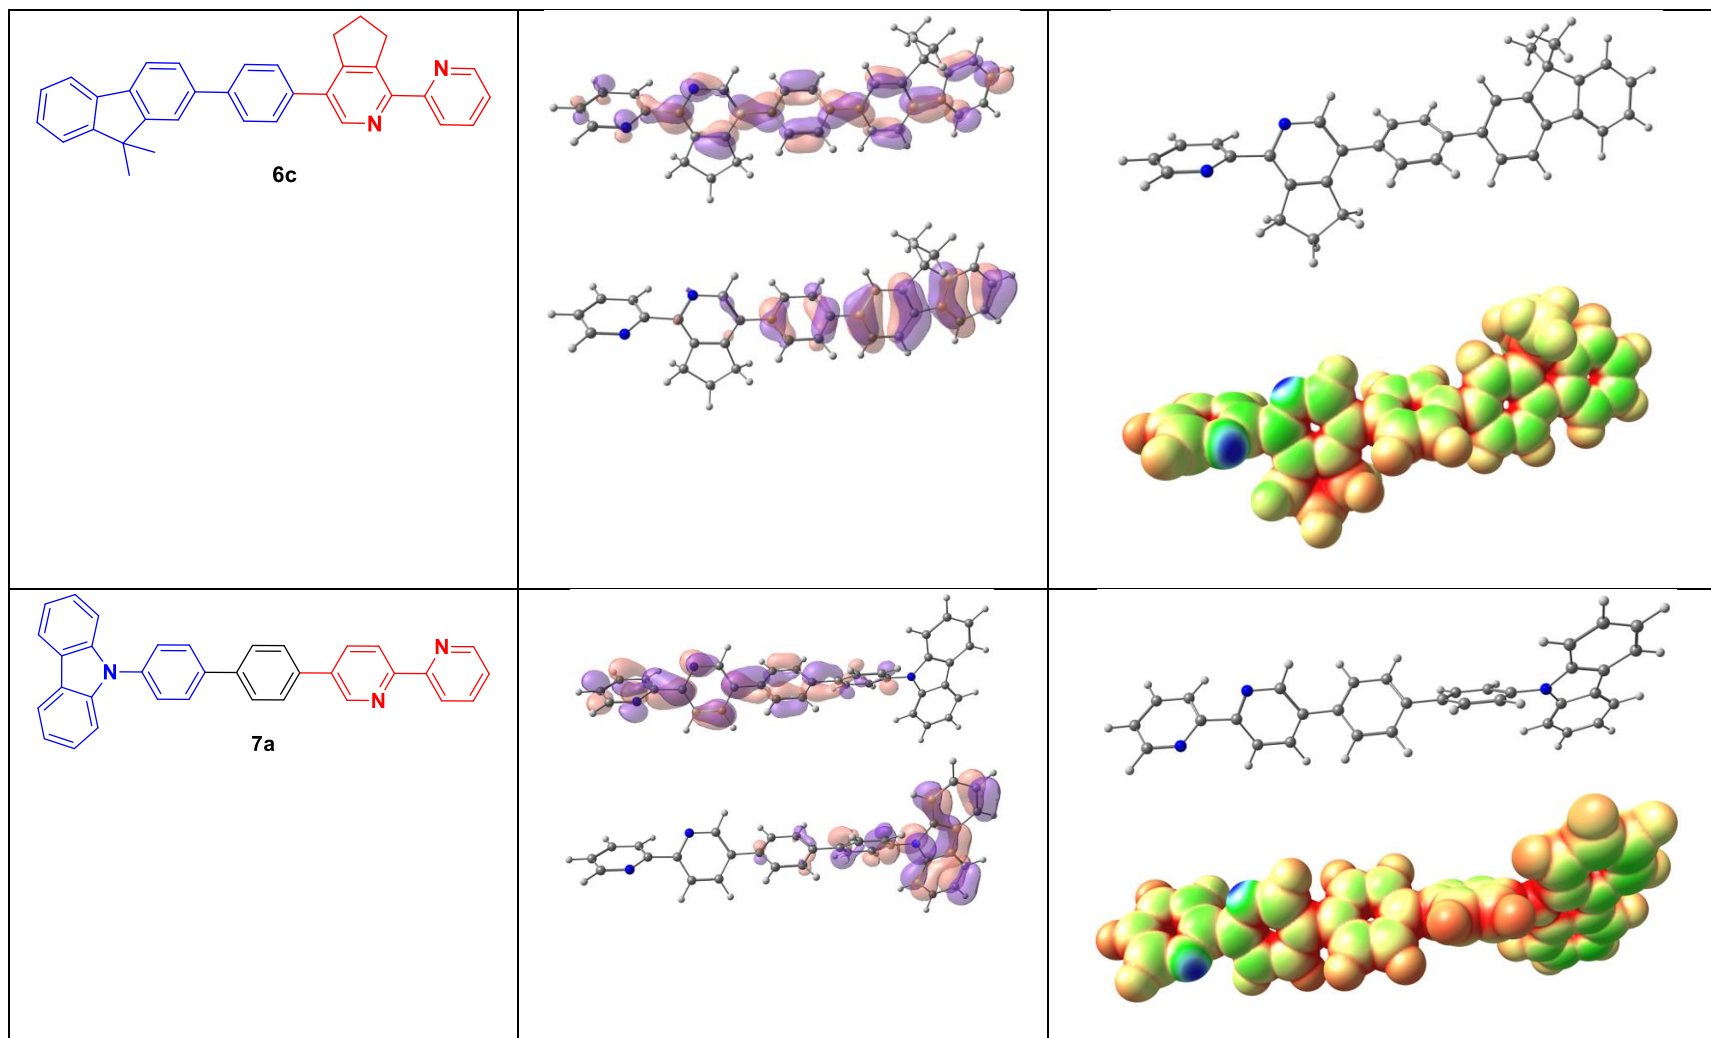

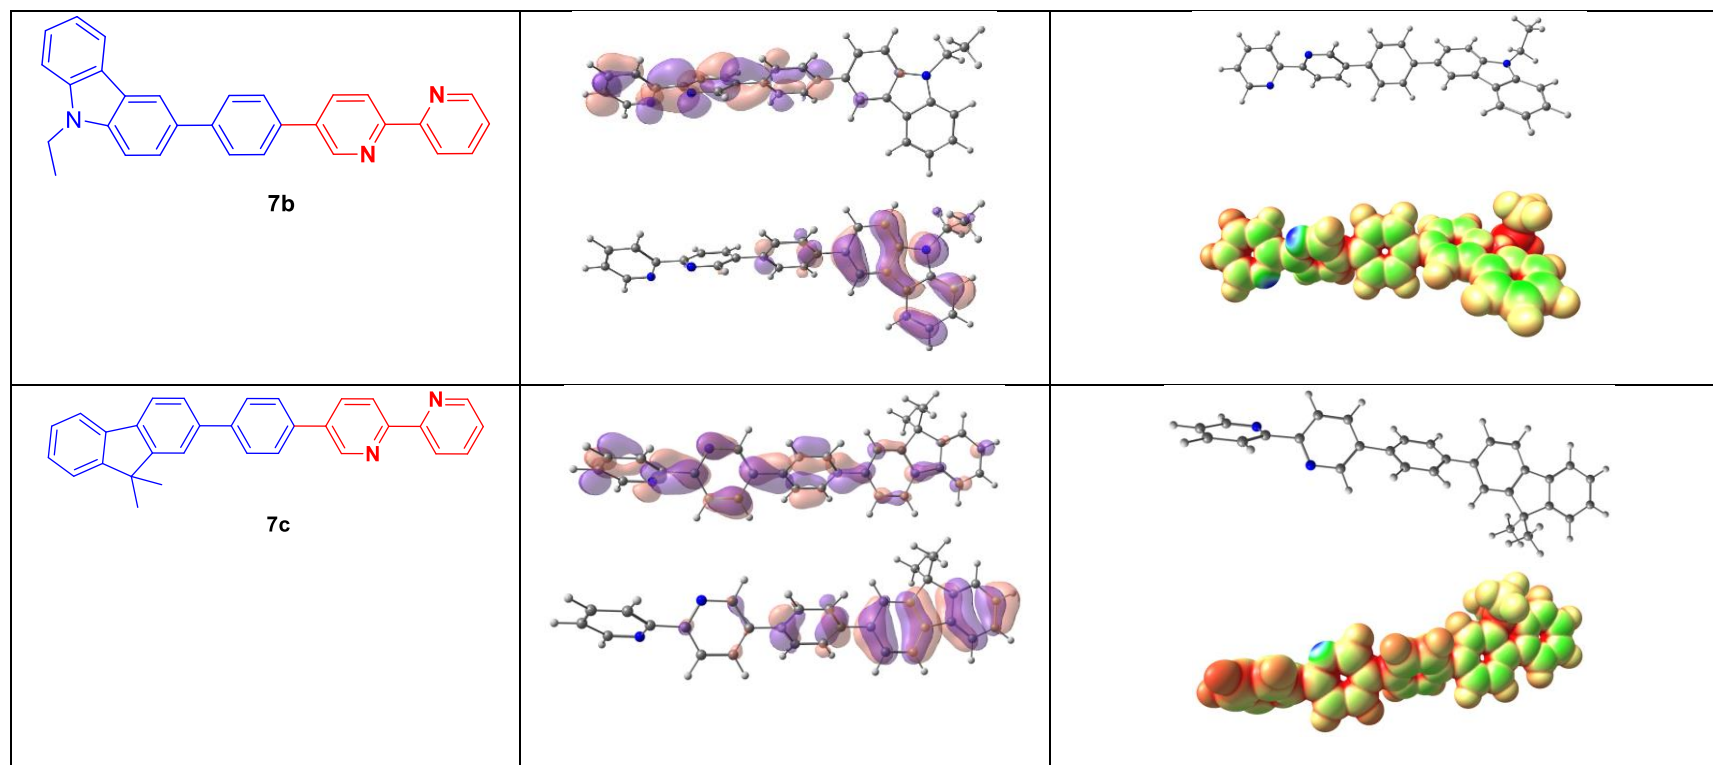

**Table S9** The optimized geometries of **6a,b** and **7a,b** in MeCN

| <b>S</b>             | 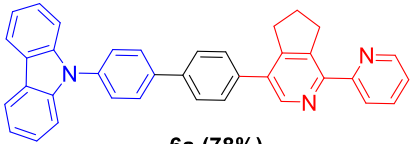 <p style="text-align: center;"><b>6a (78%)</b></p> |  <p style="text-align: center;"><b>7a (70%)</b></p> |  <p style="text-align: center;"><b>6b (80%)</b></p> |  <p style="text-align: center;"><b>7b (72%)</b></p> |
|----------------------|----------------------------------------------------------------------------------------------------------------------------------------|-----------------------------------------------------------------------------------------------------------------------------------------|------------------------------------------------------------------------------------------------------------------------------------------|------------------------------------------------------------------------------------------------------------------------------------------|
| <b>S<sub>0</sub></b> | 119                                                                                                                                    | 125                                                                                                                                     | 119                                                                                                                                      | 120                                                                                                                                      |
| <b>S<sub>1</sub></b> | 94                                                                                                                                     | 119                                                                                                                                     | 121                                                                                                                                      | 120                                                                                                                                      |

**Table S10** The optimized geometries of **6c** in cyclohexane/THF/MeCN

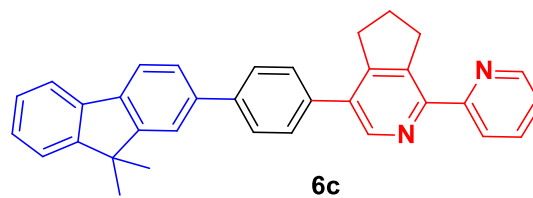

| <b>S</b> | <b>Cyclohexane</b>                                                                 | <b>THF</b>                                                                          | <b>MeCN</b>                                                                          |
|----------|------------------------------------------------------------------------------------|-------------------------------------------------------------------------------------|--------------------------------------------------------------------------------------|
| $S_0$    | 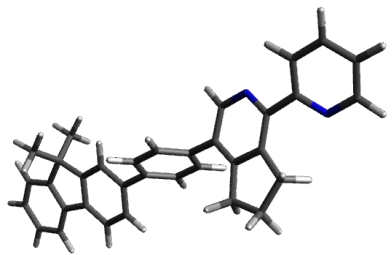  |   |   |
| $S_1$    |  |  |  |



**Table S11** The optimized geometries of **7c** in cyclohexane/THF/MeCN

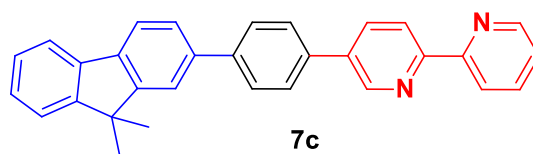

| <b>S</b>             | <b>Cyclohexane</b>                                                                | <b>THF</b>                                                                          | <b>MeCN</b>                                                                          |
|----------------------|-----------------------------------------------------------------------------------|-------------------------------------------------------------------------------------|--------------------------------------------------------------------------------------|
| <b>S<sub>0</sub></b> | 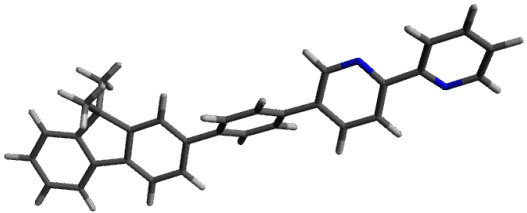 |   |   |
| <b>S<sub>1</sub></b> |  |  |  |

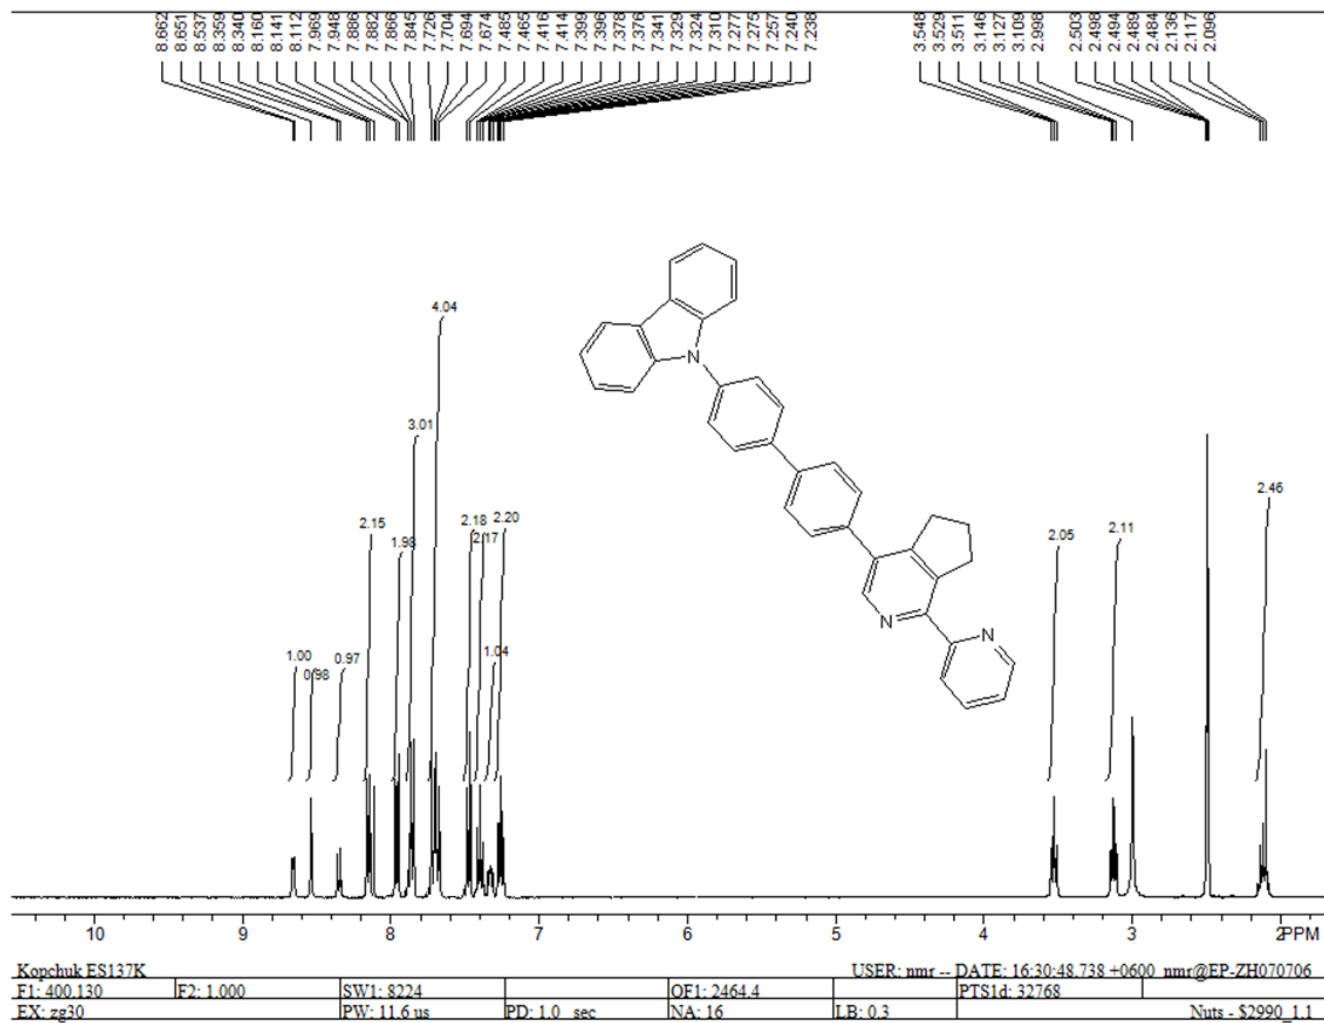

Figure S16 <sup>1</sup>H NMR of 6a in DMSO -d<sub>6</sub>

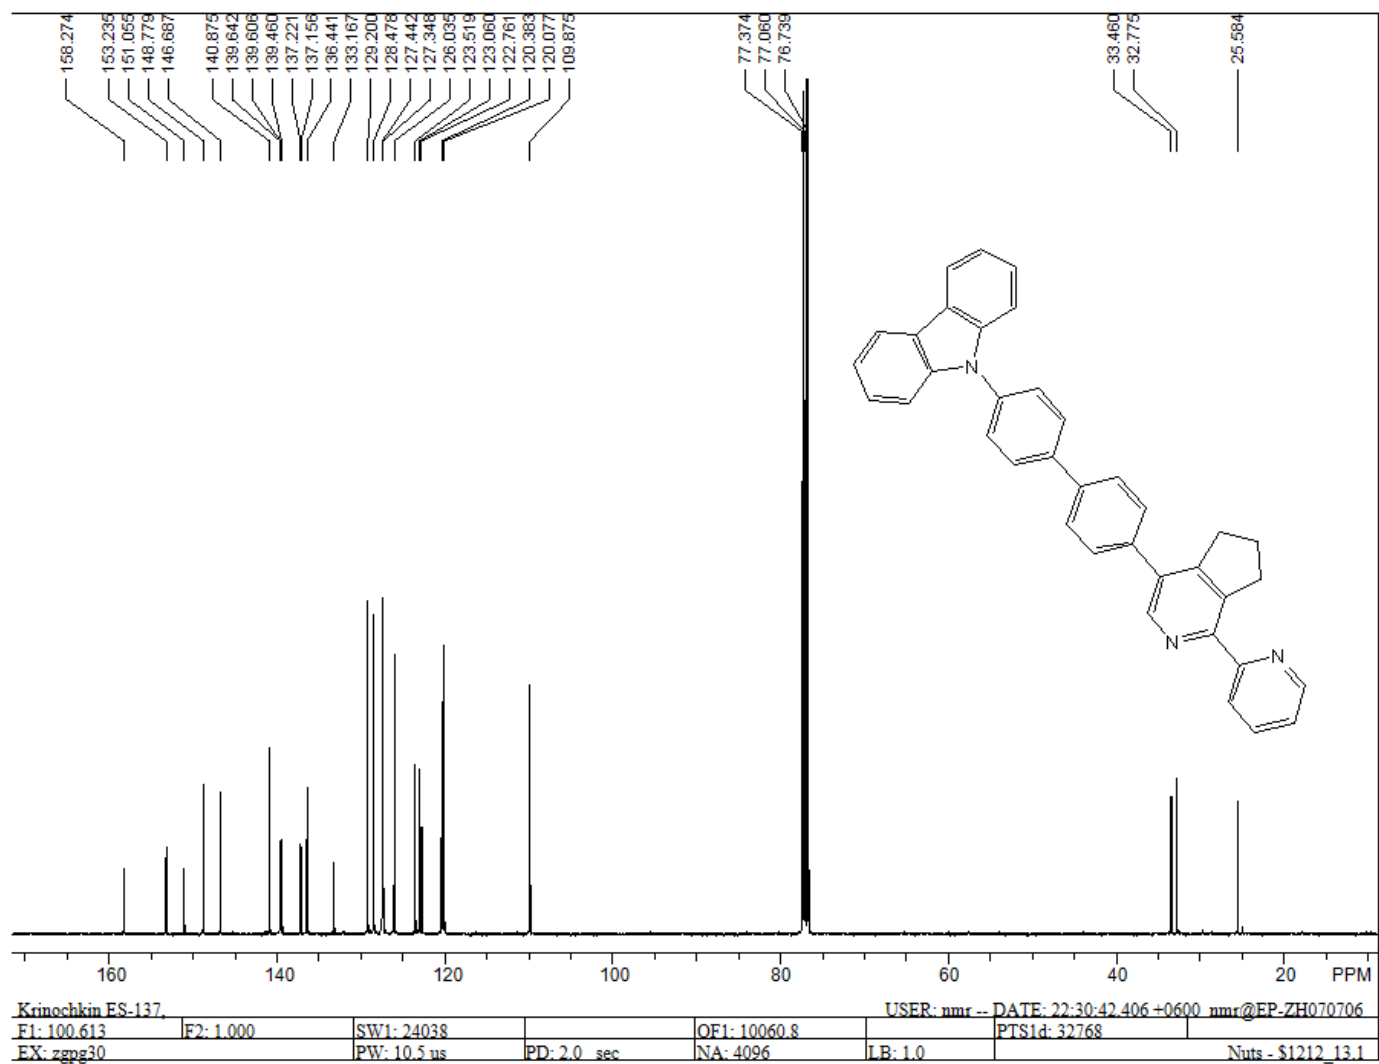

Figure S17. <sup>13</sup>C NMR of 6a B CDCl<sub>3</sub>

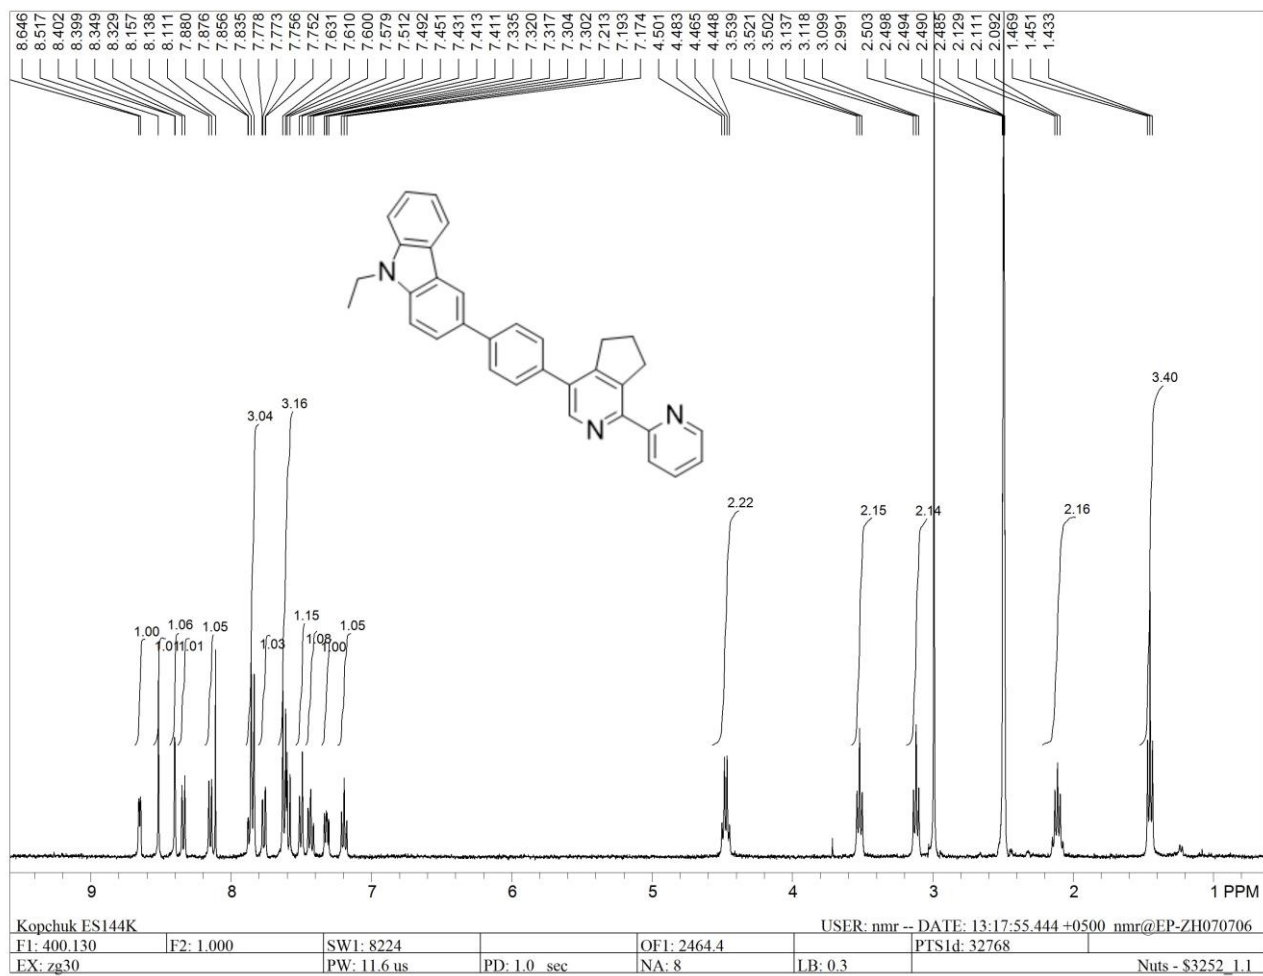

Figure S18.  $^1\text{H}$  NMR of **6b** in  $\text{DMSO-}d_6$

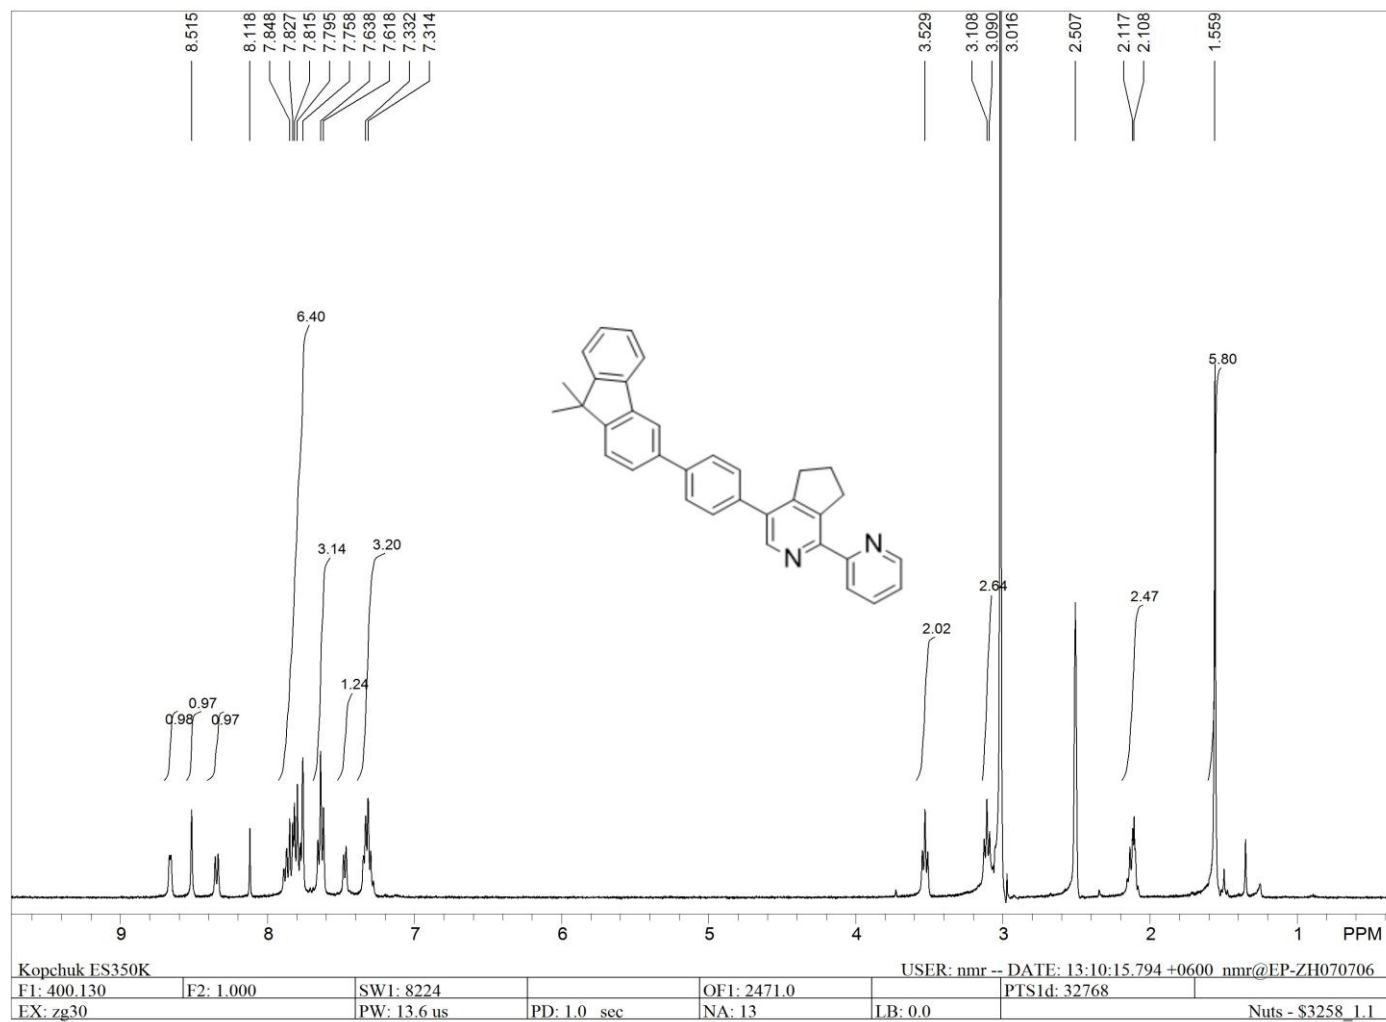

**Figure S19.** <sup>1</sup>H NMR of **6c** in DMSO-*d*<sub>6</sub>

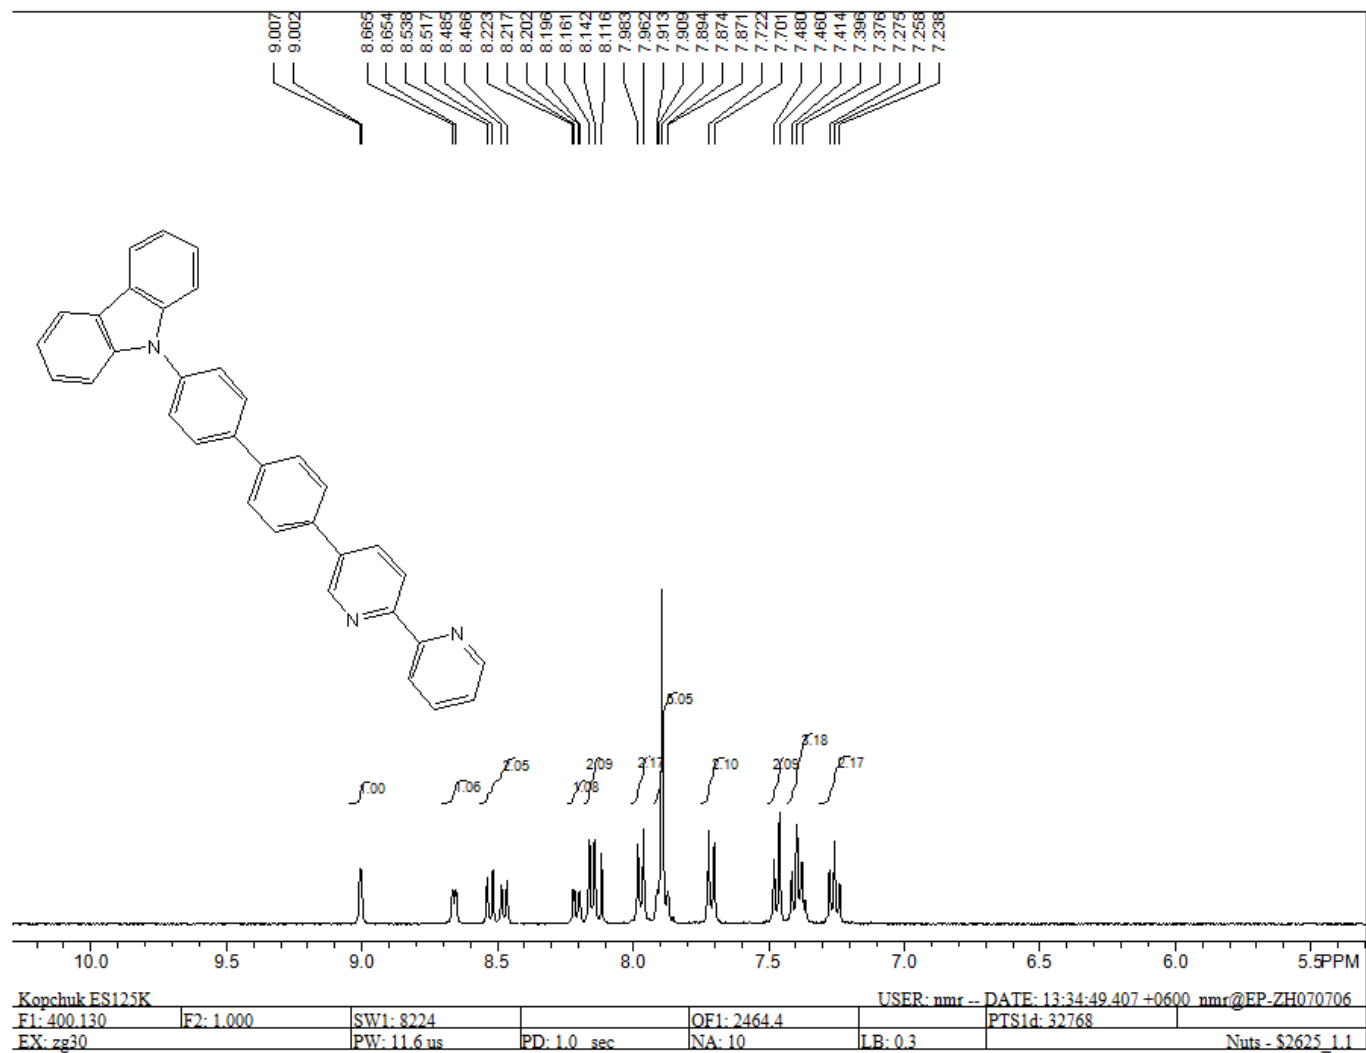

Figure S20 <sup>1</sup>H NMR of 7a in DMSO -d<sub>6</sub>

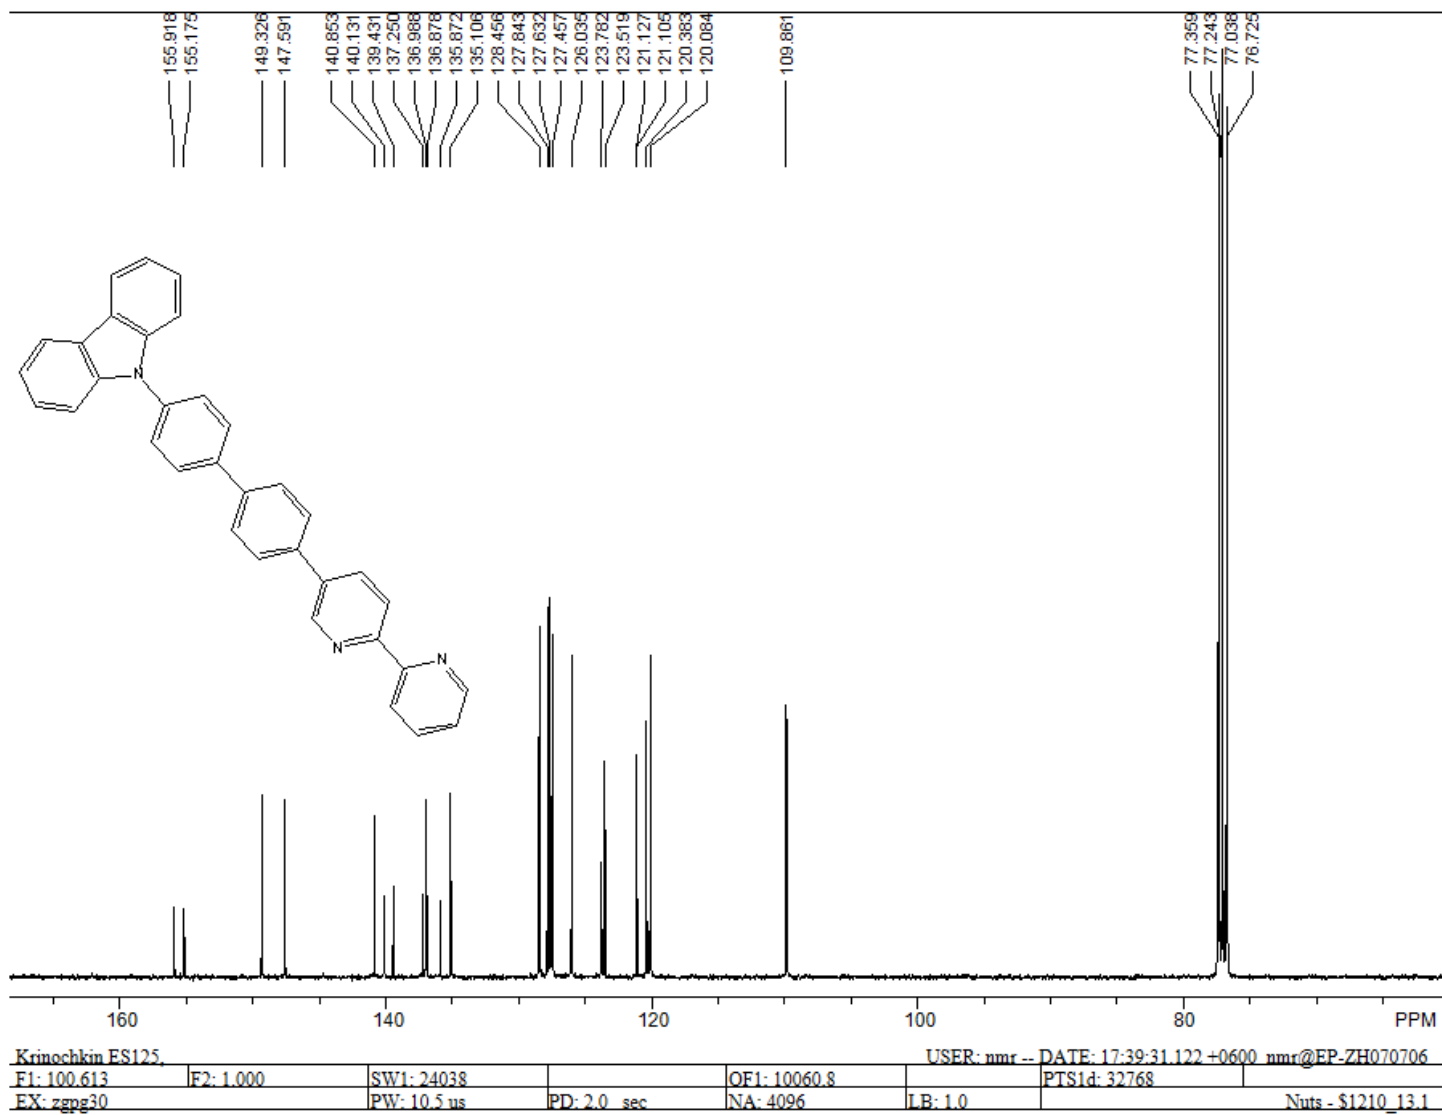

Figure S21 <sup>13</sup>C NMR of 7a in CDCl<sub>3</sub>

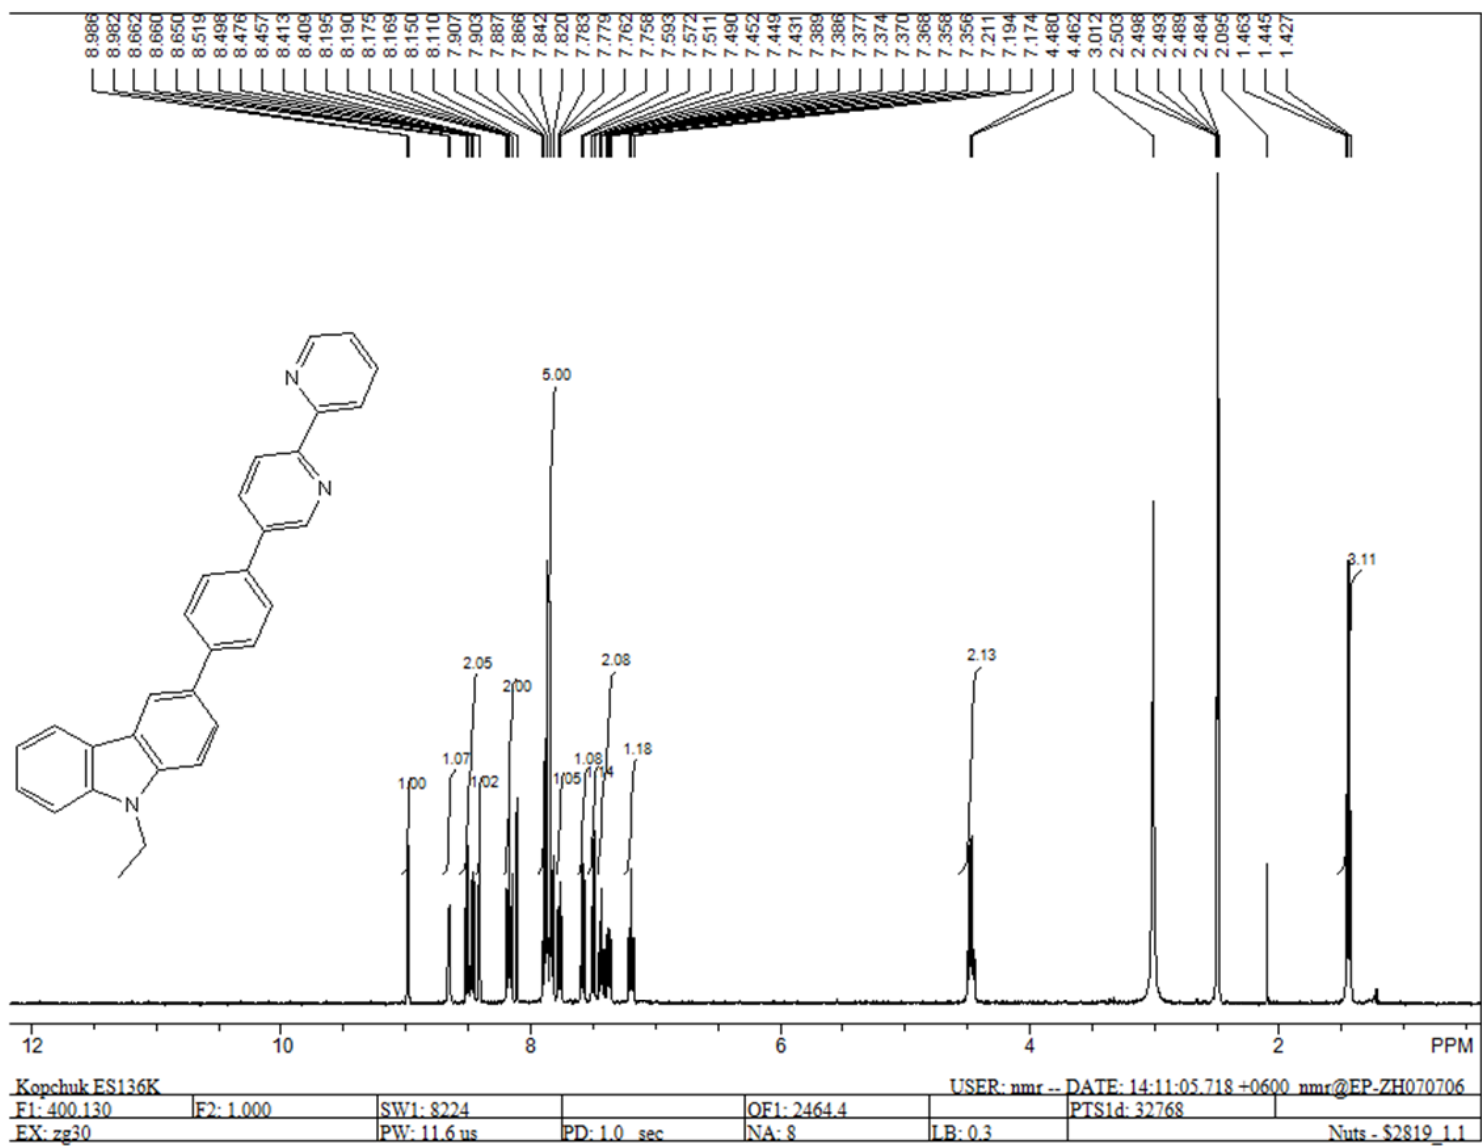

Figure S22 <sup>1</sup>H NMR of 7b in DMSO -d<sub>6</sub>



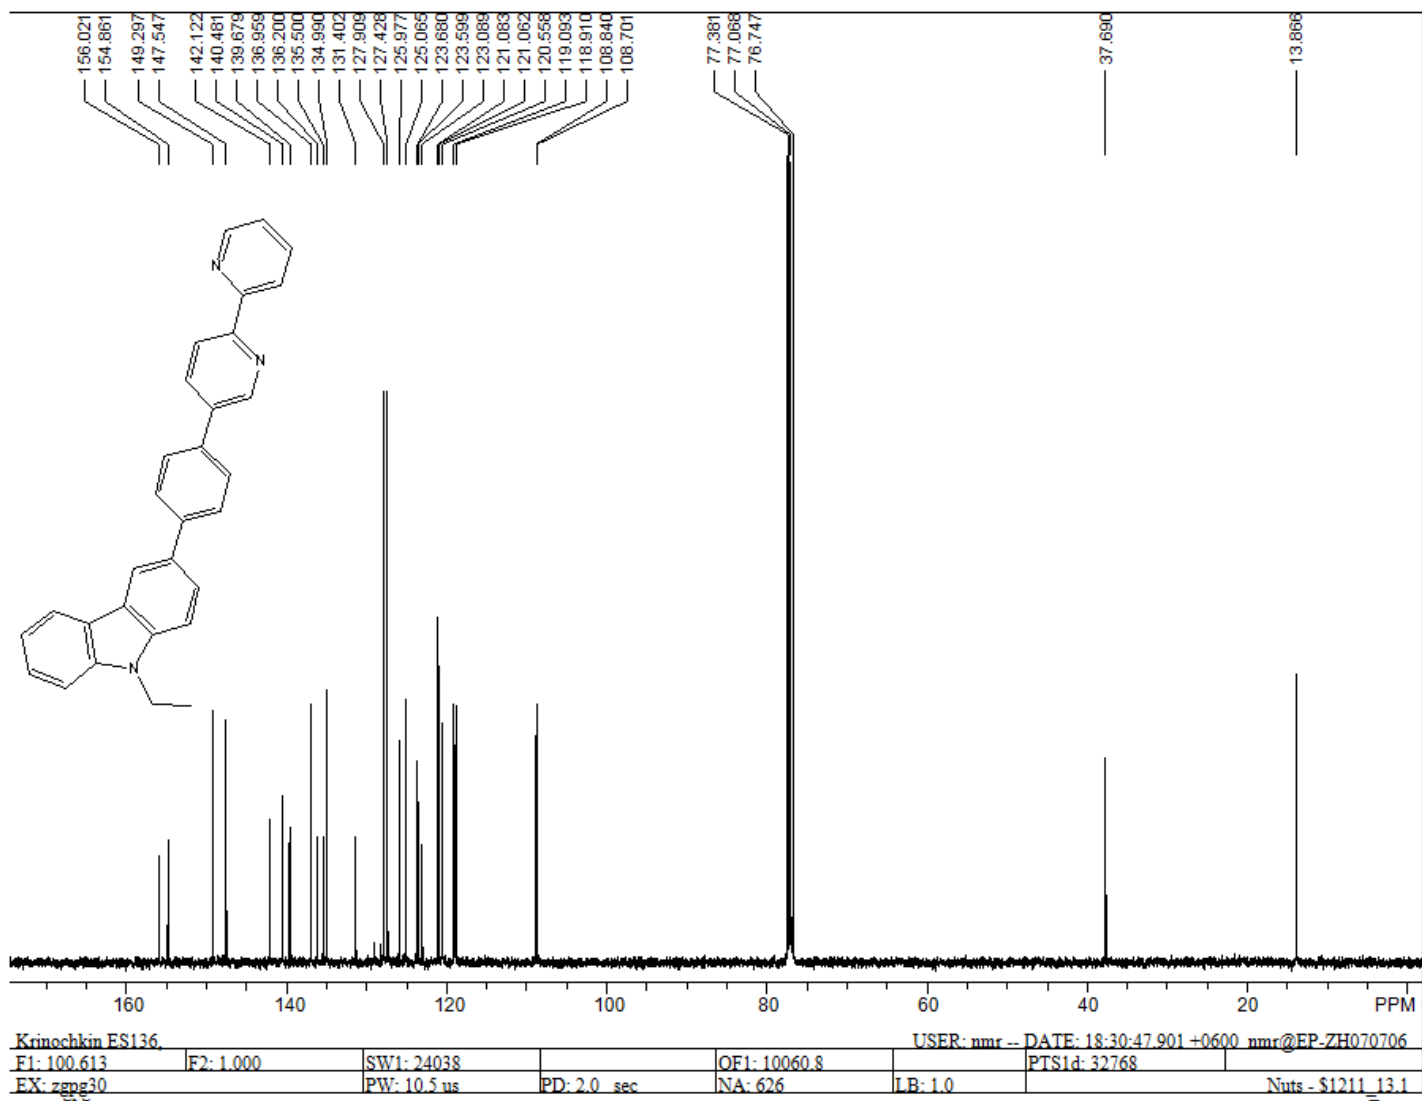

Figure S23  $^{13}\text{C}$  NMR of **7b** in  $\text{CDCl}_3$

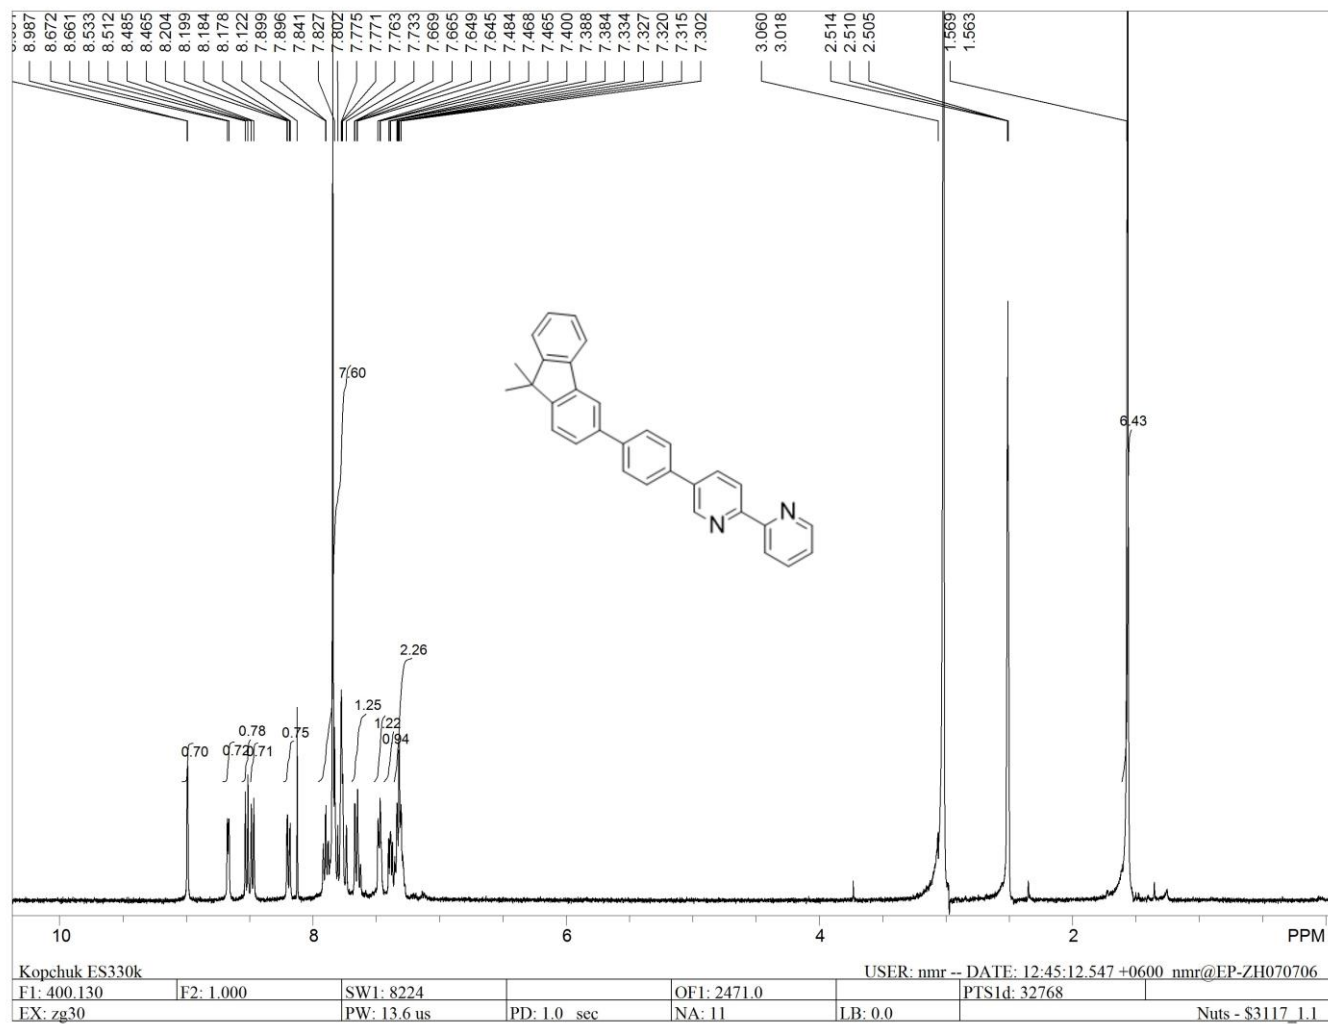

**Figure S24.**  $^1\text{H}$  NMR of **7c** in  $\text{DMSO-}d_6$

## References

- 1 E. S. Starnovskaya, D. S. Kopchuk, A. F. Khasanov, O. S. Tanya, S. Santra, K. Giri, M. Rahman, I. S. Kovalev, G. v Zyryanov, A. Majee and V. N. Charushin, *Dyes and Pigments*, 2019, **162**, 324–330.
- 2 O. V. Shabunina, D. Yu. Kapustina, A. P. Krinochkin, G. A. Kim, D. S. Kopchuk, G. v. Zyryanov, F. Li and O. N. Chupakhin, *Mendeleev Communications*, 2017, **27**, 602–604.
